# Supplementary material for: Genomic surveillance uncovers regional variation in HCV transmission networks among people who use drugs in rural U.S. communities
Source: Research Square preprint supplement (doi:10.21203/rs.3.rs-6810633/v1), 2025-06-10
Supplement: Supplementary file 1 [file e36d61ac744c59ea3d6cbdce.docx]

**Supplementary Information**

**Supplementary Table 1. Overview of samples sent to the GHOST laboratory for HCV sequencing.**

| **Sites** | **# Samples Sent** | **# QC Negative Samples *** | **# PCR failed** | **# Sequenced** | **# Passed GHOST QC**  **Sequencing** |
| --- | --- | --- | --- | --- | --- |
| Illinois | 13 | 6 | 6 | 1 | 1 |
| Kentucky | 437 | 97 | 58 | 282 | 251 |
| New England | 229 | 54 | 34 | 141 | 129 |
| North Carolina | 53 | 5 | 2 | 46 | 41 |
| Ohio | 106 | 30 | 8 | 68 | 64 |
| Oregon | 75 | 8 | 14 | 53 | 50 |
| West Virginia | 21 | 3 | 6 | 12 | 5 |
| Wisconsin | 267 | 90 | 9 | 168 | 151 |

* Samples denoted as QC negative are those below our limit of detection which means little if any viral RNA is present for amplification work.

**Supplementary Figure 1. Treemap overview of the diversity of HCV genotypes in study sites.** The size of each genotype is proportional to the number of sequences detected in the lineage for **(A)** Kentucky, **(B)** New England, **(C)** Wisconsin, **(D)** Ohio, **(E)** Oregon and **(F)** North Carolina. Note West Virginia and Illinois are not shown due to the small number of sequenced samples.

**Supplementary Figure 2. Frequency of sequenced samples defined by cluster complexity and their relationship with RDS recruitment.** Clusters are separated into dyads and complex networks.
